# Supplementary material for: Reinforcement of nanofibrillar hydrogels via cyclodextrin and self-assembling peptide interactions for controlled drug delivery
Source: Royal Society of Chemistry journal article supplement (doi:10.1039/d3nj05745c), 2024-01-01
Supplement: d3nj05745c1.pdf [file d3nj05745c1.pdf]

## Electronic Supporting Information (ESI)

### **Reinforcement of Nanofibrillar Hydrogels via Cyclodextrin and Self-Assembling Peptide Interactions for Controlled Drug Delivery**

Fangling Cao,<sup>a</sup> Jing Xu,<sup>a</sup> Xiujie Wang,<sup>a</sup> Yuanyuan Liu,<sup>a</sup> Shuqin Pang,<sup>a</sup> Qishu Jiao,<sup>a</sup> Shuyao Zhou,<sup>a</sup>

Wenying Zhong<sup>\*abc</sup> and Keming Xu<sup>\*ab</sup>

[<sup>a</sup>] Department of Chemistry, China Pharmaceutical University, Nanjing 210009, China.

[<sup>b</sup>] Key Laboratory of Biomedical Functional Materials, China Pharmaceutical University, Nanjing 210009, China.

[<sup>c</sup>] Key Laboratory of Drug Quality Control and Pharmacovigilance, China Pharmaceutical University, Nanjing 210009, China.

Corresponding Author

\*E-mail: wyzhong@cpu.edu.cn; \*E-mail: kmxu@cpu.edu.cn; Tel: 86-025-86185180; Fax: 86-025-86185160; Address: Department of Chemistry, China Pharmaceutical University, Nanjing 211198, Jiangsu, China.

## Table of contents

**Fig. S1.** MS of peptide Fmoc-GFFG. (ESI-MS:  $C_{37}H_{36}N_4O_7$ , cal.MW = 648, obsvd.[M-H]<sup>-</sup> = 647.2).

**Fig. S2.** <sup>1</sup>H NMR spectrum of peptide Fmoc-GFFG.

**Fig. S3.** HPLC spectrum of peptide Fmoc-GFFG.

**Fig. S4.** Flow sweep of Fmoc-GFFG/SBE-β-CD (1%/2 eq) hydrogel.

**Fig. S5.** 2D NOESY spectrum of the Fmoc-GFFG/SBE-β-CD inclusion complex.

**Fig. S6.** Fluorescence spectra of Fmoc-GFFG with or without SBE-β-CD.

**Fig. S7.** (A) Molecular structure of Fmoc-GGGG. (B) Gel pictures of Fmoc-GGGG (2%) without (left) or with 2 eq SBE-β-CD (right).

**Fig. S8.** Dynamic time sweep of Fmoc-GFFG/SBE-β-CD hydrogels with different HCPT equivalent.

**Table S1.** Gelation time of Fmoc-GFFG with different types of β-CD.

**Table S2.** Gelation time of Fmoc-GFFG with various ratios of SBE-β-CD.

**Table S3.** The association constants between SBE-β-CD and various anti-tumor drugs.

**Table S4.** The calculated parameters for the HCPT release from various hydrogel formulations using a Ritger-Peppas model.

**Table S5.** IC<sub>50</sub> values of HCPT, SBE-β-CD@HCPT and Fmoc-GFFG/SBE-β-CD@HCPT.

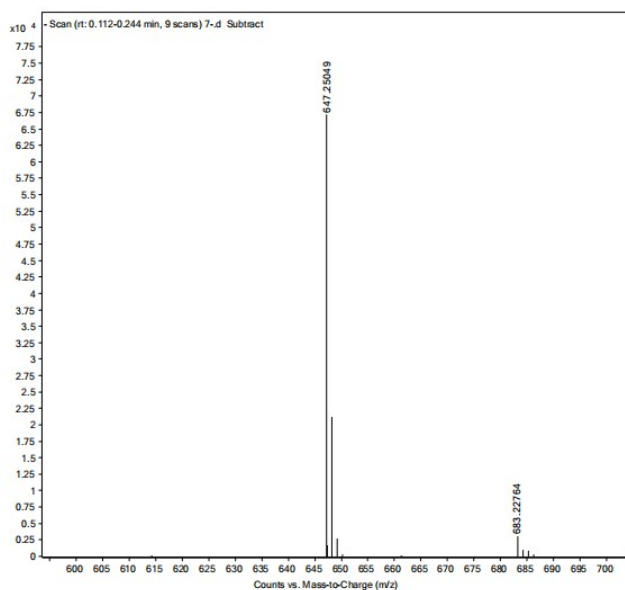

**Fig. S1.** MS of peptide Fmoc-GFFG. (ESI-MS:  $C_{37}H_{36}N_4O_7$ , cal.MW = 648, obsvd.[M-H]<sup>-</sup> = 647.2)

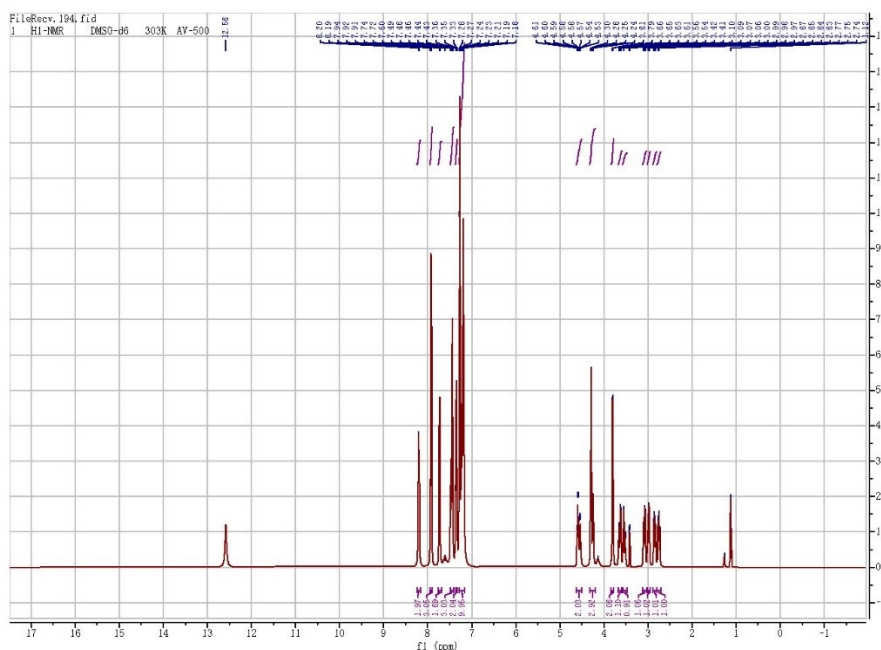

**Fig. S2.** <sup>1</sup>H NMR spectrum of peptide Fmoc-GFFG

$\delta$  12.37 (d,  $J = 170.3$  Hz, 1H), 7.90 (d,  $J = 8.3$  Hz, 2H), 7.69 (d,  $J = 7.3$  Hz, 4H), 7.44 (d,  $J = 5.6$  Hz, 2H), 7.40 (t,  $J = 7.4$  Hz, 5H), 7.31 (t,  $J = 7.3$  Hz, 5H), 3.77 (d,  $J = 5.1$

Hz, 4H), 3.60 (dd,  $J = 16.8, 5.8$  Hz, 2H), 3.50 (dd,  $J = 16.6, 5.7$  Hz, 2H), 3.37 (dt,  $J = 14.0, 7.0$  Hz, 1H), 3.05 (dd,  $J = 13.8, 4.2$  Hz, 2H), 2.99 – 2.91 (m, 2H), 2.82 (dd,  $J = 13.5, 9.6$  Hz, 2H), 2.75 – 2.67 (m, 2H).

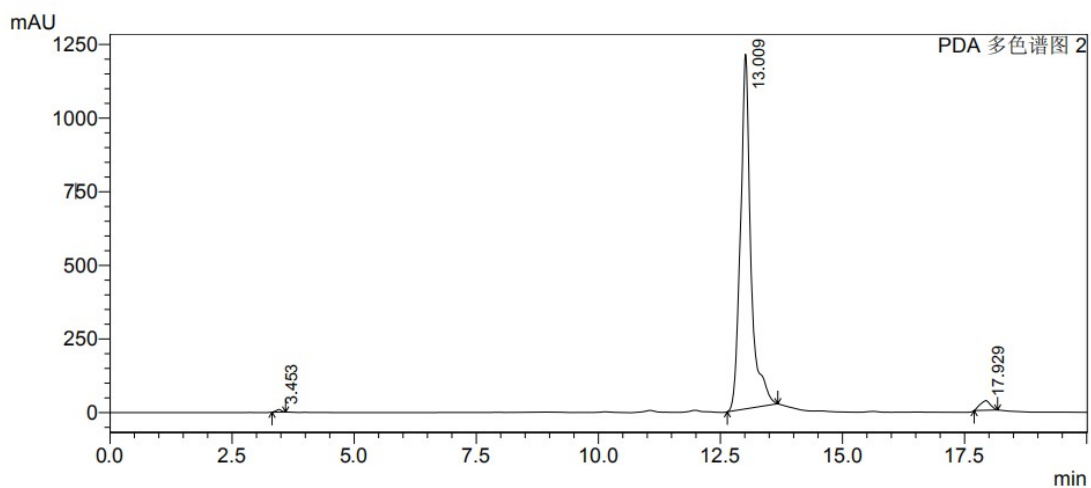

**Fig. S3.** HPLC spectrum of peptide Fmoc-GFFG.

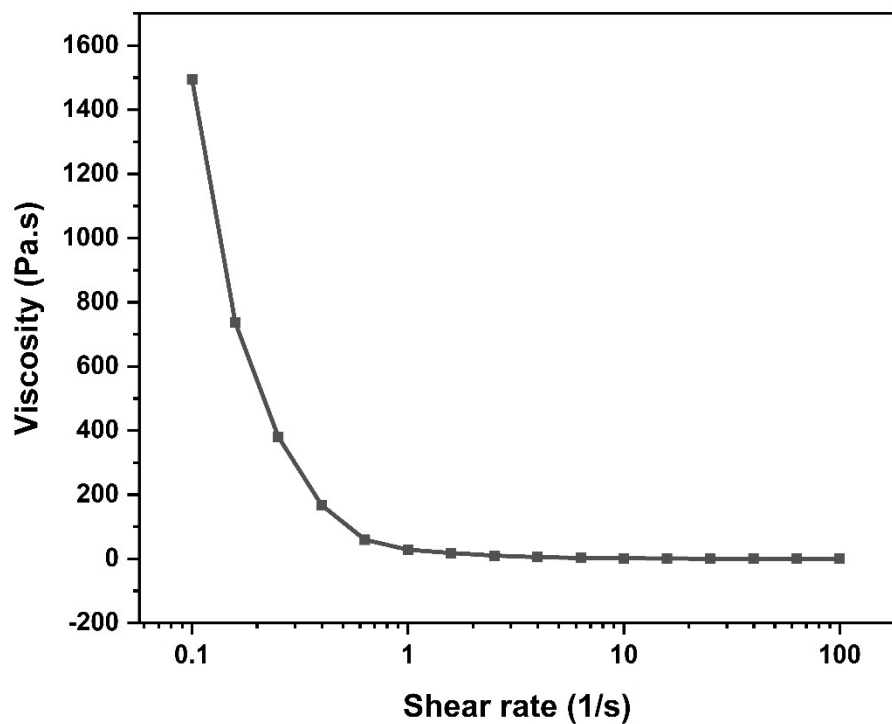

**Fig. S4.** Flow sweep of Fmoc-GFFG/SBE- $\beta$ -CD (1%/2 eq) hydrogel.

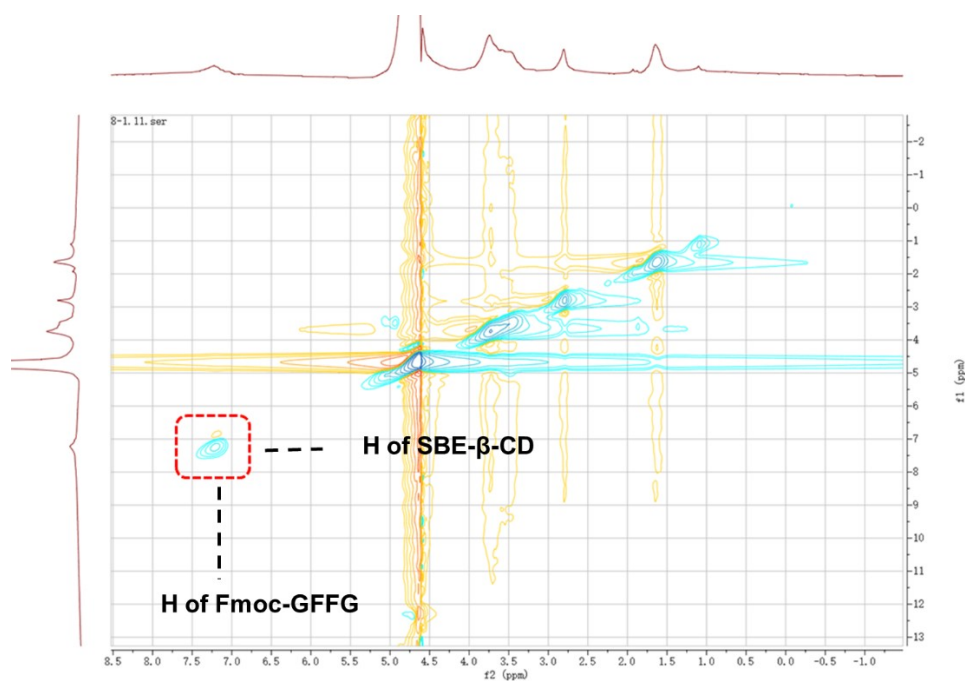

Fig. S5. 2D NOESY spectrum of the Fmoc-GFFG/SBE- $\beta$ -CD inclusion complex.

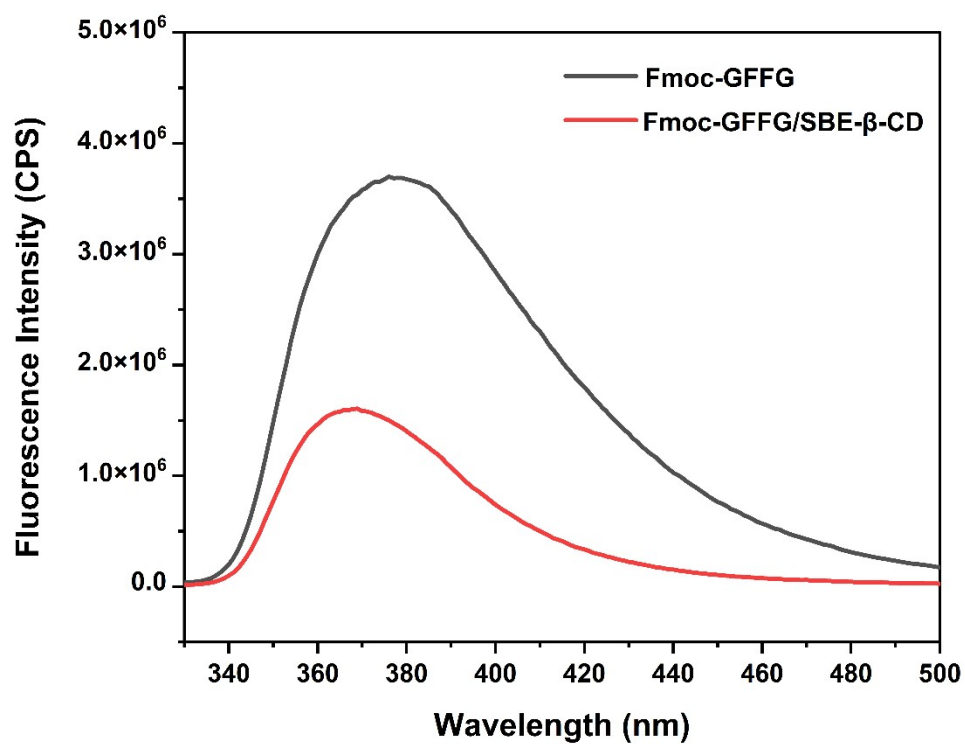

Fig. S6. Fluorescence spectra of Fmoc-GFFG with or without SBE- $\beta$ -CD.

**A**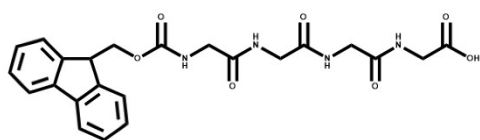**B**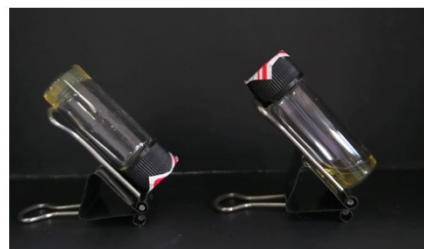

**Figure. S7.** Molecular structure of Fmoc-GGGG. (B) Gel pictures of Fmoc-GGGG (2%) without (left) or with 2 eq SEB- $\beta$ -CD (right).

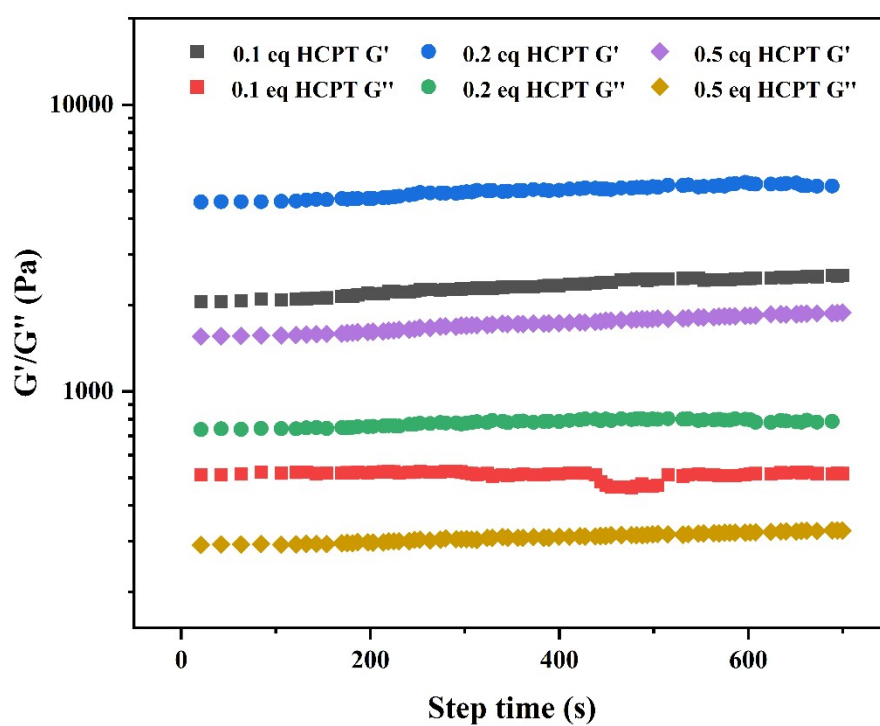

**Fig. S8.** Dynamic time sweep of Fmoc-GFFG/SBE- $\beta$ -CD hydrogels with different HCPT equivalent.

**Table S1.** Gelation time of Fmoc-GFFG with different types of  $\beta$ -CD.

| <b>Formulation</b>  | Fmoc-GFFG | + $\beta$ -CD | + HP- $\beta$ -CD | + SBE- $\beta$ -CD |
|---------------------|-----------|---------------|-------------------|--------------------|
| <b>GelationTime</b> | 60 min    | —             | 24 h              | 10 min             |

—, no gelation

**Table S2.** Gelation time of Fmoc-GFFG with various ratios of SBE- $\beta$ -CD.

| <b>SBE-<math>\beta</math>-CD</b> | 0 eq   | 0.5 eq | 2 eq   | 4 eq | 6 eq | 8 eq |
|----------------------------------|--------|--------|--------|------|------|------|
| <b>Gelation<br/>Time</b>         | 60 min | 40 min | 10 min | 24 h | —    | —    |

—, no gelation

**Table S3.** The association constants between SBE- $\beta$ -CD and various anti-tumor drugs.

| <b>Anti-tumor drug</b> | <b>SBE-<math>\beta</math>-CD (mol/L)</b> | <b>Inclusion Complex (<math>\mu\text{g/ml}</math>)</b> | <b>Slope</b> | <b>Intercede</b> | <b>Complexation Constant</b> |
|------------------------|------------------------------------------|--------------------------------------------------------|--------------|------------------|------------------------------|
| <b>Gem</b>             | 0.0000                                   | 0.05979                                                | 0.5138483    | 0.0585215        | 18.06                        |
|                        | 0.0411                                   | 0.07856                                                |              |                  |                              |
|                        | 0.0657                                   | 0.09035                                                |              |                  |                              |
|                        | 0.0986                                   | 0.11096                                                |              |                  |                              |
|                        | 0.1315                                   | 0.12606                                                |              |                  |                              |
| <b>CDDP</b>            | 0.0164                                   | 2601.5                                                 | 0.0534851    | 0.0080247        | 7.040                        |
|                        | 0.0247                                   | 2807.25                                                |              |                  |                              |
|                        | 0.0370                                   | 3032.25                                                |              |                  |                              |
|                        | 0.0493                                   | 3174.75                                                |              |                  |                              |
|                        | 0.0740                                   | 3549.75                                                |              |                  |                              |
| <b>HCPT</b>            | 0.0000                                   | 0.000007                                               | 0.0023623    | 0.0000064        | 368.1                        |
|                        | 0.0205                                   | 0.000056                                               |              |                  |                              |
|                        | 0.0288                                   | 0.000071                                               |              |                  |                              |
|                        | 0.0329                                   | 0.000083                                               |              |                  |                              |
|                        | 0.0411                                   | 0.000106                                               |              |                  |                              |
| <b>Cur</b>             | 0.0329                                   | 0.000003                                               | 0.0006263    | 0.0000189        | 33.09                        |
|                        | 0.0657                                   | 0.000022                                               |              |                  |                              |
|                        | 0.0986                                   | 0.000041                                               |              |                  |                              |
|                        | 0.1315                                   | 0.000061                                               |              |                  |                              |
|                        | 0.1643                                   | 0.000087                                               |              |                  |                              |



**Table S4.** The calculated parameters for the HCPT release from various hydrogel formulations using a Ritger-Peppas model.

| <b>Formulation</b>                                   | <b>n</b> | <b>k</b> | <b>R<sup>2</sup></b> |
|------------------------------------------------------|----------|----------|----------------------|
| <b>Fmoc-GFFG@HCPT</b>                                | 0.3500   | 0.1063   | 0.9844               |
| <b>Fmoc-GFFG/SBE-<math>\beta</math>-<br/>CD@HCPT</b> | 0.5467   | 0.0961   | 0.9977               |

**Table S5.** IC<sub>50</sub> values of HCPT, SBE- $\beta$ -CD@HCPT and Fmoc-GFFG/SBE- $\beta$ -CD@HCPT.

| <b>Formulation</b>                              | <b>IC<sub>50</sub></b> |
|-------------------------------------------------|------------------------|
| <b>HCPT</b>                                     | 0.25                   |
| <b>SBE-<math>\beta</math>-CD@HCPT</b>           | 0.36                   |
| <b>Fmoc-GFFG/SBE-<math>\beta</math>-CD@HCPT</b> | 0.58                   |
